# Supplementary material
Source: Springer Nature journal article supplement (https://www.springermedizin.de/resource/supplementary/12937_2003_16_MOESM1_ESM.pdf/25654214)

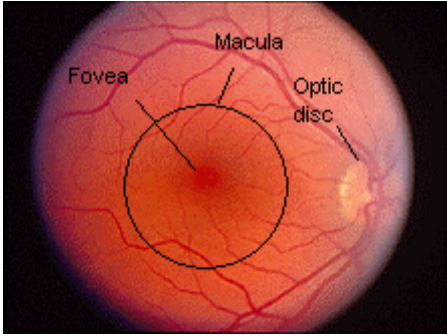

Macula

Fovea

Optic  
disc

Supplement: MOESM1 [file 25654214]
